# Supplementary material for: Heterotrimeric G–proteins in Picea abies and their regulation in response to Heterobasidion annosum s.l. infection
Source: PubMed Central journal article supplement (PMC4676809; doi:10.1186/s12870-015-0676-1), 2015-12-12
Supplement: 12870_2015_676_MOESM2_ESM.pdf [file 12870_2015_676_MOESM2_ESM.pdf]

```
*
AtGG2 M E A G - - - - S S N S S G Q L S G R V V D T R - - - - [ 32]
AtGG1 M R E E T V V Y E Q E E S V S H G - - - - - - - - [ 32]
PaGG1 M E E E T - - - - D T S V S T G A Q N G R P Q D S K Q P P T E [ 32]
PaGG2 M Q G T T R W I S - - - - - - - - - D M K R L E P R P T P V A [ 32]
```

```
*           *           *           * *   * *
AtGG2 - - - G K H R I Q A E L K R L E Q E A R F L E E E L E Q L E K [ 64]
AtGG1 - - - G G K H R I L A E L A R V E Q E V A F L E K E L K E V E N [ 64]
PaGG1 T D V G G K H R K L A E L H R L N Q E I R F L E E E L E D L D K [ 64]
PaGG2 P N L R G I Q H R L S Q L N H L E Q Q I K L L E D E L E E L H N [ 64]
```

---

```
*           *           * *   *   * * *
AtGG2 M D N A S A S C K E F L D S V D S K P D P L L P E T T G P V N A [ 96]
AtGG1 T D I V S T V C E E L L S V I E K G P D P L L P L T N G P L N L [ 96]
PaGG1 I D K A T S A C K E M L L I I E N T P D P L L S V T K G P E N P [ 96]
PaGG2 T D R A S T V C R D V L M T V D S R P D A F L P S T I G P E N A [ 96]
```

---

```
*           *           *           *   *
AtGG2 T W D Q W F E G P K E A K R C G C S I L [116]
AtGG1 G W D R W F E G P N G G E G C R C L I L [116]
PaGG1 A W D R W F E G P V E S D G C K C W I I [116]
PaGG2 A W K Q W L E K T T E S R G C G C C L - [116]
```

---
