# Supplementary material for: Heterotrimeric G–proteins in Picea abies and their regulation in response to Heterobasidion annosum s.l. infection
Source: PubMed Central journal article supplement (PMC4676809; doi:10.1186/s12870-015-0676-1), 2015-12-12

a

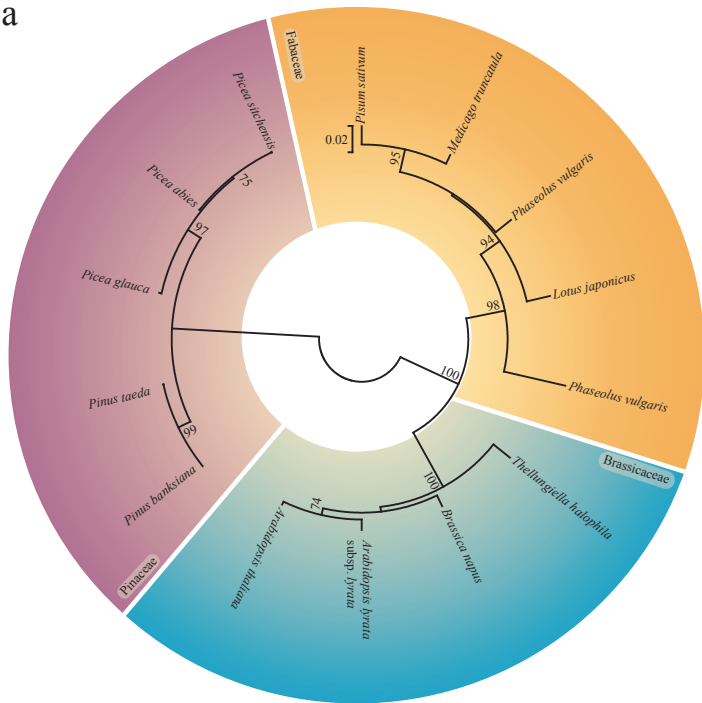

b

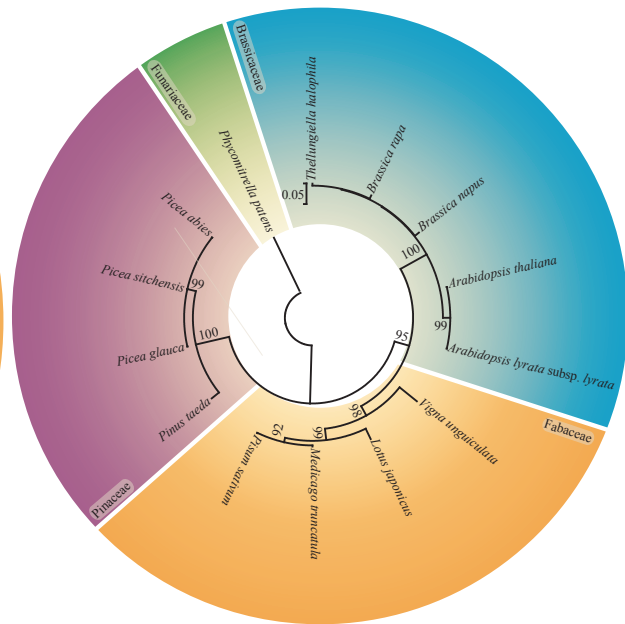

Supplement: 12870_2015_676_MOESM5_ESM.pdf [file 12870_2015_676_MOESM5_ESM.pdf]
