# Supplementary material for: Heterotrimeric G–proteins in Picea abies and their regulation in response to Heterobasidion annosum s.l. infection
Source: BMC Plant Biol. 2015 Dec 12;15:287. doi: 10.1186/s12870-015-0676-1 (PMC4676809; doi:10.1186/s12870-015-0676-1)
Supplement: Additional file 6: — Alignment of Gy-subunit sequences. (PDF 8038 kb) [file 12870_2015_676_MOESM6_ESM.pdf]

|                                                      |   |   |   |   |   |   |   |   |   |   |   |   |   |   |   |   |   |   |   |   |   |   |   |   |   |
|------------------------------------------------------|---|---|---|---|---|---|---|---|---|---|---|---|---|---|---|---|---|---|---|---|---|---|---|---|---|
| ABK26455.1 <i>P. sitchensis</i>                      | - | - | M | I | N | K | S | K | - | - | - | - | - | M | R | K | P | N | A | P | - | - | - | - |   |
| <i>P</i> AGG3                                        | - | - | M | I | N | K | S | K | - | - | - | - | - | M | R | K | P | N | A | P | - | - | - | - |   |
| BT111616.1 <i>P. glauca</i>                          | - | - | M | I | N | K | S | K | - | - | - | - | - | M | R | K | P | N | A | P | - | - | - | - |   |
| DT638145.1 <i>P. taeda</i>                           | - | - | M | I | S | K | S | K | - | - | - | - | - | M | R | K | P | N | A | P | - | - | - | - |   |
| Pp1s22 182V6.1 <i>P. patens</i>                      | - | - | M | Y | S | A | G | S | Q | Q | S | N | Y | - | - | - | R | S | N | V | G | A | S | S |   |
| Pp1s39 119V6.2 <i>P. Patens</i>                      | - | - | M | N | S | R | P | Q | - | - | - | - | - | A | T | A | S | T | P | A | P | L | L |   |   |
| Medtr6021170.1 <i>M. truncatula</i>                  | - | - | M | D | G | E | - | - | - | - | - | - | - | Y | N | S | S | T | V | S | L | T | S |   |   |
| Phvul.003G130200.1 <i>P. vulgaris</i>                | - | M | A | T | T | P | T | L | - | - | - | - | - | - | - | - | - | - | - | - | - | - | R |   |   |
| Medtr4g125190.1 <i>M. truncatula</i>                 | - | - | M | - | T | M | V | R | - | - | - | - | - | - | S | S | S | S | S | S | S | S | V |   |   |
| Medtr2g042200.1 <i>M. truncatula</i>                 | - | M | V | T | T | P | T | R | D | - | - | - | - | - | - | P | S | S | N | V | M | S | L |   |   |
| Carubv10002620m <i>C. rubella</i>                    | - | - | M | S | A | P | S | S | C | - | G | G | V | G | G | G | - | R | E | A | D | G | E | V | G |
| Thhalv10014548m <i>T. halophila</i>                  | - | M | M | A | A | P | S | - | - | - | G | G | G | G | - | - | - | S | V | - | G | A | G | G |   |
| XP 002874008.1 <i>A. lyrata</i> subsp. <i>Lyrata</i> | - | - | M | S | A | P | S | - | - | - | G | G | G | G | G | G | - | E | S | A | A | G | V | S |   |
| AT5G20635.1 <i>A. thaliana</i> AGG3                  | - | - | M | S | A | P | S | - | - | - | G | G | G | E | G | G | G | K | E | S | A | A | G | G | V |
| ADE77369.1 <i>P. sitchensis</i>                      | - | - | M | I | K | V | S | - | - | - | - | - | - | - | - | - | - | - | - | - | - | - | - | - |   |
| <i>P</i> AGG4                                        | - | - | M | I | K | V | S | - | - | - | - | - | - | - | - | - | - | - | - | - | - | - | - | - |   |
| Phvul.007G175700.1 <i>P. vulgaris</i>                | - | - | M | A | S | E | T | A | S | S | A | - | D | E | E | A | V | A | V | S | A | A | G | A | G |
| G7ICP9 <i>M. truncatula</i>                          | - | - | M | A | S | E | T | A | S | S | A | - | D | E | E | K | E | T | L | V | V | S | V | S | A |
| Bra007741 <i>B. rapa</i>                             | - | - | M | E | L | E | D | - | - | - | - | - | - | - | - | - | - | - | - | - | - | - | - | - |   |
| EE552948.1 <i>B. napus</i>                           | - | - | M | E | L | E | D | - | - | - | - | - | - | - | - | - | - | - | - | - | - | - | - | - |   |
| FD578839.1 <i>R. sativus</i>                         | - | - | M | E | E | E | - | - | - | - | - | - | - | - | - | - | - | - | - | - | - | - | - | - |   |
| Thhalv10006334m <i>T. halophila</i>                  | - | - | M | - | E | E | T | A | V | - | Y | E | Q | E | - | - | A | L | S | L | - | - | - | G |   |
| Carubv10018305m <i>C. rubella</i>                    | - | - | M | E | E | E | T | A | A | A | A | Y | E | Q | - | - | - | - | - | - | - | - | - | - |   |
| XP 00287072.1 <i>A. lyrata</i> subsp. <i>Lyrata</i>  | - | - | M | R | I | G | D | P | Q | - | - | E | E | E | - | P | V | - | S | L | - | - | - | G |   |
| NP 567147.1 <i>A. thaliana</i> AGG1                  | - | - | M | R | E | E | T | V | V | - | Y | E | Q | E | E | S | V | - | S | H | - | - | - | G |   |
| FF393368.1 <i>V. unguiculata</i>                     | - | - | M | A | S | E | T | E | S | S | A | - | D | E | E | A | V | A | V | P | A | A | G | A | G |
| XP 002883385.1 <i>A. lyrata</i> subsp. <i>Lyrata</i> | - | - | M | E | A | - | - | - | - | - | - | - | - | - | - | - | - | - | - | - | G | S | S | S |   |
| ISXYS <i>L. japonicus</i>                            | - |   |   |   |   |   |   |   |   |   |   |   |   |   |   |   |   |   |   |   |   |   |   |   |   |

[illegible]

[illegible][illegible]

|                    |                         |   |   |   |   |   |   |   |   |   |   |   |   |   |   |   |   |   |   |   |   |   |   |   |   |
|--------------------|-------------------------|---|---|---|---|---|---|---|---|---|---|---|---|---|---|---|---|---|---|---|---|---|---|---|---|
| ABK26455.1         | P. stichensis           | - | - | - | - | - | - | - | - | - | - | - | - | - | D | I | - | - | - | R | G | R | H |   |   |
| BGG3               |                         | - | - | - | - | - | - | - | - | - | - | - | - | - | D | I | - | - | - | R | G | R | H |   |   |
| BT11616.1          | P. glauca               | - | - | - | - | - | - | - | - | - | - | - | - | - | D | I | - | - | - | R | G | R | H |   |   |
| DT638145.1         | P. taeda                | - | - | - | - | - | - | - | - | - | - | - | - | - | D | I | - | - | - | R | G | K | H |   |   |
| PpIs22 182V6.1     | P. patens               | I | P | S | L | L | F | H | R | P | S | I | S | A | - | P | S | - | I | - | - | R | G | R | S |
| PpIc39 119V6.2P.   | Patens                  | - | - | - | - | - | - | - | - | - | - | - | - | - | - | - | - | - | G | R | G | R | N |   |   |
| Meditr8g02t1170.1  | M. truncatula           | - | - | - | - | - | - | - | - | - | - | - | - | - | V | D | F | - | - | H | G | K | R |   |   |
| Phvul.003G130200.1 | P. vulgaris             | - | - | - | - | - | - | - | - | - | - | - | - | - | D | L | - | - | - | Y | G | K | R |   |   |
| Meditr4g125190.1   | M. truncatula           | - | - | - | - | - | - | - | - | - | - | - | - | - | D | L | - | - | - | Y | G | K | R |   |   |
| Meditr2g042200.1   | M. truncatula           | - | - | - | - | - | - | - | - | - | - | - | - | - | D | L | - | - | - | Y | G | K | R |   |   |
| Carubv10002620m    | C. rubella              | - | - | - | - | - | - | - | - | - | - | - | - | - | D | L | - | - | - | Y | G | K | R |   |   |
| Thhalv10014548m    | T. halophila            | - | - | - | - | - | - | - | - | - | - | - | - | - | D | L | - | - | - | Y | G | K | R |   |   |
| XP_002874008.1     | A. lyrata subsp. Lyrata | - | - | - | - | - | - | - | - | - | - | - | - | - | D | L | - | - | - | Y | G | K | R |   |   |
| AT5G26063.1        | A. thaliana AGG3        | - | - | - | - | - | - | - | - | - | - | - | - | - | D | L | - | - | - | Y | G | K | R |   |   |
| ADE77369.1         | P. stichensis           | S | R | R | G | Q | P | E | P | R | T | P | P | L | H | P | - | D | I | - | - | N | G | K | Y |
| BGG4               |                         | S | R | R | G | Q | P | E | P | R | T | P | P | R | H | P | - | D | I | - | - | N | G | K | Y |
| Phvul.007G175700.1 | P. vulgaris             | - | - | - | - | - | - | - | - | - | - | - | - | - | T | D | K | - | - | R | G | R | H |   |   |
| G7ICP9             | M. truncatula           | - | - | - | - | - | - | - | - | - | - | - | - | - | T | D | K | - | - | R | G | K | H |   |   |
| Bra007741          | B. rapa                 | - | - | - | - | - | - | - | - | - | - | - | - | - | G | D | S | - | - | R | G | K | H |   |   |
| EE552948.1         | B. napus                | - | - | - | - | - | - | - | - | - | - | - | - | - | G | D | A | - | - | R | G | K | H |   |   |
| FD578839.1         | R. sativus              | - | - | - | - | - | - | - | - | - | - | - | - | - | - | D | A | - | - | R | G | K | H |   |   |
| Thhalv10006834m    | T. halophila            | - | - | - | - | - | - | - | - | - | - | - | - | - | - | D | A | - | - | R | G | K | H |   |   |
| Carubv10018303m    | C. rubella              | - | - | - | - | - | - | - | - | - | - | - | - | - | - | E | A | V | S | L | G | G | K | H |   |
| XP_00287672L.1     | A. lyrata subsp. Lyrata | - | - | - | - | - | - | - | - | - | - | - | - | - | - | - | - | - | - | - | G | K | H |   |   |
| NP_567147.1        | A. thaliana AGG1        | - | - | - | - | - | - | - | - | - | - | - | - | - | - | - | - | - | - | - | G | K | H |   |   |
| FE393368.1         | V. unguiculata          | - | - | - | - | - | - | - | - | - | - | - | - | - | T | D | K | - | - | R | G | R | H |   |   |
| XP_002883385.1     | A. lyrata subsp. Lyrata | - | - | - | - | - | - | - | - | - | - | - | - | - | - | D | T | - | - | R | G | K | H |   |   |
| ISXNY5             | L. japonicus            | - | - | - | - | - | - | - | - | - | - | - | - | - | A | D | T | - | - | R | G | K | H |   |   |
| Bra023782          | B. rapa                 | - | - | - | - | - | - | - | - | - | - | - | - | - | - | D | T | - | - | R | G | K | H |   |   |
| ACX43275.1</       |                         |   |   |   |   |   |   |   |   |   |   |   |   |   |   |   |   |   |   |   |   |   |   |   |   |

|                                                      |   |   |   |   |   |   |   |   |   |   |   |   |   |   |   |   |   |   |   |   |   |   |   |   |   |
|------------------------------------------------------|---|---|---|---|---|---|---|---|---|---|---|---|---|---|---|---|---|---|---|---|---|---|---|---|---|
| ABK26453.1 <i>P. sichensis</i>                       | R | K | Q | V | E | L | N | R | L | T | K | E | I | S | L | L | E | E | E | L | K | T | L | E | G |
| PaGG3                                                | R | K | Q | V | E | L | N | R | L | T | K | E | I | S | L | L | E | E | E | L | K | T | L | E | G |
| BT111616.1 <i>P. glauca</i>                          | R | K | R | V | E | L | N | R | L | T | K | E | I | S | L | L | E | E | E | L | K | T | L | E | G |
| DT638145.1 <i>P. taeda</i>                           | R | K | Q | V | E | L | N | R | L | T | K | E | I | S | L | L | E | E | E | L | K | T | L | E | G |
| Pp1s22 182V6.1 <i>P. patens</i>                      | R | D | L | H | Q | L | N | T | - | E | I | Q | - | - | L | L | Q | E | E | L | N | S | L | D | D |
| Pp1s39 119V6.2.P. <i>Patens</i>                      | R | K | Q | T | E | L | Q | H | L | N | N | E | I | Q | L | L | Q | E | E | L | E | V | L | N | N |
| Medtr8g021170.1 <i>M. truncatula</i>                 | K | Q | M | V | K | I | Q | V | L | E | K | E | I | G | L | L | Q | E | E | L | K | S | L | E | G |
| PhvuL003G130200.1 <i>P. vulgaris</i>                 | R | E | T | A | R | V | H | M | L | E | R | E | I | T | F | L | E | E | E | L | K | S | V | E | G |
| Medtr4g125190.1 <i>M. truncatula</i>                 | R | E | M | A | K | V | Q | M | L | E | R | E | I | G | F | L | E | E | E | L | K | S | M | E | G |
| Medtr2g042200.1 <i>M. truncatula</i>                 | R | E | M | A | K | V | Q | M | L | E | R | E | I | S | F | L | E | E | E | L | K | S | S | E | G |
| Carubv10002620m <i>C. rubella</i>                    | R | E | A | A | R | V | Q | M | L | E | R | E | I | G | F | L | E | G | E | I | K | F | V | E | G |
| Thhalv10014548m <i>T. halophila</i>                  | R | E | A | A | R | V | Q | M | L | E | R | E | I | G | F | L | E | G | E | I | K | F | I | E | G |
| XP_002874008.1 <i>A. lyrata</i> subsp. <i>Lyrata</i> | R | E | A | A | R | V | Q | M | L | S | R | E | I | G | F | L | E | G | E | I | K | F | T | E | G |
| AT3G20635.1 <i>A. thaliana</i> AGG3                  | R | E | A | A | R | V | Q | M | L | E | R | E | I | G | F | L | E | G | E | I | K | F | I | E | G |
| ADE77369.1 <i>P. sichensis</i>                       | R | K | Q | A | E | L | D | Q | L | N | R | E | I | S | S | L | E | E | E | L | I | S | L | E | G |
| PaGG4                                                | R | K | Q | A | E | L | D | Q | L | N | R | E | I | S | S | L | E | E | E | L | I | S | L | E | G |
| PhvuL007G175700.1 <i>P. vulgaris</i>                 | R | I | L | A | E | L | K | R | L | D | Q | D | S | K | F | L | Q | E | E | L | E | E | L | E | K |
| G71CP9 <i>M. truncatula</i>                          | R | I | L | A | E | L | K | R | L | Q | Q | D | T | K | F | L | Q | E | E | L | D | E | L | E | K |
| Bra007741 <i>B. rapa</i>                             | R | I | L | A | E | L | G | R | V | E | Q | E | V | I | F | L | E | K | E | L | E | E | L | G | Q |
| EE532948.1 <i>B. napus</i>                           | R | I | L | A | E | L | G | R | V | E | E | E | V | R | F | L | E | K | E | L | E | E | L | G | Q |
| FD578839.1 <i>R. sativus</i>                         | R | I | L | A | E | L | G | R | V | E | Q | E | V | K | F | L | E | K | E | L | E | E | L | G | Q |
| Thhalv10006334m <i>T. halophila</i>                  | R | I | L | A | E | L | G | R | V | E | Q | E | V | R | F | L | E | K | E | L | E | E | L | G | H |
| Carubv10018305m <i>C. rubella</i>                    | R | I | L | A | D | L | A | R | V | E | Q | L | V | F | L | E | K | E | L | V | E | V | E | Q |   |
| XP_002876721.1 <i>A. lyrata</i> subsp. <i>Lyrata</i> | R | I | L | A | E | L | A | R | V | E | Q | E | V | V | F | L | E | K | E | L | E | E | V | E | S |
| NP_567147.1 <i>A. thaliana</i> AGG1                  | R | I | L | A | E | L | A | R | V | E | Q | E | V | A | F | L | E | K | E | L | K | E | V | E | N |
| FF393568.1 <i>V. unguiculata</i>                     | R | I | L | A | E | L | K | R | L | D | Q | D | S | K | F | L | Q | E | E | L | E | E | L | E | K |
| XP_002883385.1 <i>A. lyrata</i> subsp. <i>Lyrata</i> | R |   |   |   |   |   |   |   |   |   |   |   |   |   |   |   |   |   |   |   |   |   |   |   |   |

|                                                      |   |   |   |   |   |   |   |   |   |   |   |   |   |   |   |   |   |   |   |   |   |   |   |   |   |   |
|------------------------------------------------------|---|---|---|---|---|---|---|---|---|---|---|---|---|---|---|---|---|---|---|---|---|---|---|---|---|---|
| ABK26453.1 <i>P. stichensis</i>                      | L | P | P | S | S | K | C | G | K | G | V | V | E | S | I | E | K | R | P | D | P | L | L | P | F |   |
| <i>PaGG3</i>                                         | L | P | P | S | S | K | C | G | K | G | V | V | E | S | I | E | K | R | P | D | P | L | L | P | F |   |
| BT111616.1 <i>P. glauca</i>                          | L | P | P | S | S | K | C | G | K | G | V | V | E | S | I | E | K | R | P | D | P | L | L | P | F |   |
| DT638145.1 <i>P. taeda</i>                           | L | P | P | A | S | K | C | G | K | G | V | V | E | S | I | E | K | R | P | D | P | L | L | P | F |   |
| Pp1s22 182V6.1 <i>P. patens</i>                      | T | P | P | A | S | K | A | C | K | D | L | V | A | F | V | E | S | R | P | D | P | F | I | P | S |   |
| Pp1s39 119V6.2P: <i>Patens</i>                       | T | P | L | A | S | K | A | C | K | D | L | I | T | F | V | E | N | L | P | D | P | F | L | S | S |   |
| Medtr8g021170.1 <i>M. truncatula</i>                 | L | H | P | A | S | R | G | G | I | E | L | D | A | F | V | E | S | T | Q | S | L | N | P | I |   |   |
| PhvuL003G130200.1 <i>P. vulgaris</i>                 | L | Q | P | A | S | R | C | G | K | E | V | A | D | Y | V | M | A | N | P | D | P | L | L | P | - |   |
| Medtr4g125190.1 <i>M. truncatula</i>                 | L | Q | P | A | S | K | C | G | K | E | I | A | D | Y | V | V | A | N | S | D | P | L | L | P | - |   |
| Medtr2g042200.1 <i>M. truncatula</i>                 | F | Q | P | A | S | K | C | G | K | E | I | A | D | F | V | M | A | N | S | D | P | L | L | P | - |   |
| Carubv10002620m <i>C. rubella</i>                    | V | Q | P | A | S | R | G | C | K | E | V | S | D | F | V | A | A | N | S | D | P | M | I | P | A |   |
| Thhalv10014548m <i>T. halophila</i>                  | V | Q | P | A | S | R | C | C | K | E | V | S | D | F | V | V | A | N | S | D | P | L | I | P | A |   |
| XP 002874008.1 <i>A. lyrata</i> subsp. <i>Lyrata</i> | V | Q | P | A | S | R | C | G | K | E | V | S | D | F | V | V | A | N | S | D | P | L | I | P | A |   |
| ATSG20635.1 <i>A. thaliana</i> AGG3                  | V | Q | P | A | S | R | C | I | K | E | V | S | D | F | V | V | A | N | S | D | P | L | I | P | A |   |
| ADE77369.1 <i>P. stichensis</i>                      | L | P | P | A | S | I | C | G | K | E | V | E | E | S | V | N | A | R | S | D | P | L | L | P | P |   |
| <i>PaGG4</i>                                         | L | P | P | A | S | I | C | G | K | E | V | E | E | S | V | N | A | R | S | D | P | L | L | P | R |   |
| PhvuL007G173700.1 <i>P. vulgaris</i>                 | T | E | N | V | S | T | I | C | M | D | L | L | Q | S | M | E | S | R | P | D | P | L | L | P | E |   |
| G71CP9 <i>M. truncatula</i>                          | T | E | N | V | S | A | I | C | K | E | L | L | Q | N | M | D | S | R | P | D | P | L | L | P | E |   |
| Bra007741 <i>B. rapa</i>                             | T | D | I | V | S | A | V | C | E | E | L | L | C | L | I | E | K | A | P | D | P | L | L | P | L |   |
| EE532948.1 <i>B. napus</i>                           | T | D | T | V | P | T | V | C | E | E | L | L | C | L | I | E | K | A | P | D | P | L | L | P | L |   |
| FD578839.1 <i>R. sativus</i>                         | T | D | I | V | S | T | V | C | E | E | L | F | G | V | I | E | K | A | P | D | P | L | L | P | L |   |
| Thhalv10006334m <i>T. halophila</i>                  | T | D | I | V | S | N | V | G | E | E | L | L | C | V | I | E | K | A | P | D | P | L | L | P | L |   |
| Carubv10018305m <i>C. rubella</i>                    | T | E | I | V | S | A | V | C | E | E | L | L | C | V | I | E | K | G | P | D | P | L | L | P | L |   |
| XP 002876721.1 <i>A. lyrata</i> subsp. <i>Lyrata</i> | T | D | I | V | S | T | V | G | E | E | L | L | C | V | V | I | E | K | G | P | D | P | L | L | P | L |
| NP 567147.1 <i>A. thaliana</i> AGG1                  | T | D | I | V | S | T | V | C | E | E | L | L | S | V | I | E | K | G | P | D | P | L | L | P | L |   |
| HF393368.1 <i>V. unguiculata</i>                     | T | E | N | V | S | T | I | C | T | D | L | L | Q | S | M | E | - | - | S | R | P | - | - | - | - |   |
| XP 002883385.1 <i>A. lyrata</i> subsp. <i>Lyrata</i> | M | D | N | A | S | A | S | C | K |   |   |   |   |   |   |   |   |   |   |   |   |   |   |   |   |   |

|                    |                                       |   |   |   |   |   |   |   |   |   |   |   |   |   |   |   |   |   |   |   |   |   |
|--------------------|---------------------------------------|---|---|---|---|---|---|---|---|---|---|---|---|---|---|---|---|---|---|---|---|---|
| ABK264553.1        | <i>P. stichensis</i>                  | - | - | - | - | - | - | - | - | - | - | G | Q | A | I | S | S | W | D | R | W |   |
| PaGG3              |                                       | - | - | - | - | - | - | - | - | - | - | G | Q | A | I | S | S | W | D | R | W |   |
| BT111616.1         | <i>P. glauca</i>                      | - | - | - | - | - | - | - | - | - | - | G | Q | A | I | S | S | W | D | R | W |   |
| DTG38145.1         | <i>P. taeda</i>                       | - | - | - | - | - | - | - | - | - | - | G | Q | A | I | S | S | W | D | R | W |   |
| Pp1s22             | 182V6.1 <i>P. putens</i>              | - | - | - | - | - | - | - | - | - | - | G | P | Q | S | W | P | Y | E | R | P |   |
| Pp1s39             | 119V6.2P. <i>Putens</i>               | - | - | - | - | - | - | - | - | - | - | G | H | Q | P | W | P | Y | D | R | P |   |
| Medrtr8g021170.1   | <i>M. truncatula</i>                  | - | - | - | - | - | - | - | - | - | - | G | R | R | S | L | P | W | I | - | - |   |
| Phvul.003G130200.1 | <i>P. vulgaris</i>                    | - | - | - | - | - | - | - | - | - | - | G | M | P | - | - | - | - | - | - | - |   |
| Medrtr4g125190.1   | <i>M. truncatula</i>                  | - | - | - | - | - | - | - | - | - | - | - | - | - | - | - | - | - | - | - | - |   |
| Medrtr2g042200.1   | <i>M. truncatula</i>                  | F | Y | A | S | E | V | T | T | T | I | L | E | W | K | F | G | - | - | - | D | R |
| Carubv10002620m    | <i>C. rubella</i>                     | - | - | - | - | - | - | - | - | - | - | G | P | - | - | - | - | - | - | - | - |   |
| Thhalv10014548m    | <i>T. halophila</i>                   | - | - | - | - | - | - | - | - | - | - | G | I | P | - | - | - | - | - | - | - |   |
| XP_002874008.1     | <i>A. lyrata</i> subsp. <i>Lyrata</i> | - | - | - | - | - | - | - | - | - | - | G | P | - | - | - | - | - | - | - | - |   |
| ATSG20635.1        | <i>A. thaliana</i> AGG3               | - | - | - | - | - | - | - | - | - | - | G | P | - | - | - | - | - | - | - | - |   |
| ADE77369.1         | <i>P. stichensis</i>                  | - | - | - | - | - | - | - | - | - | - | G | E | T | R | R | P | F | R | L | K |   |
| PaGG4              |                                       | - | - | - | - | - | - | - | - | - | - | G | E | T | R | R | P | F | Q | L | K |   |
| Phvul.007G175700.1 | <i>P. vulgaris</i>                    | - | - | - | - | - | - | - | - | - | - | G | P | V | N | L | L | W | D | R | W |   |
| G71CF9             | <i>M. truncatula</i>                  | - | - | - | - | - | - | - | - | - | - | G | P | V | N | L | L | W | D | R | W |   |
| Bra007741          | <i>B. rapa</i>                        | - | - | - | - | - | - | - | - | - | - | G | P | L | N | L | G | W | D | R | W |   |
| EE552948.1         | <i>B. napus</i>                       | - | - | - | - | - | - | - | - | - | - | G | P | L | N | L | G | W | D | R | W |   |
| FD578839.1         | <i>R. sativus</i>                     | - | - | - | - | - | - | - | - | - | - | G | P | F | N | L | G | W | D | R | W |   |
| Thhalv10006334m    | <i>T. halophila</i>                   | - | - | - | - | - | - | - | - | - | - | G | P | L | N | L | G | W | D | R | W |   |
| Carubv10018305m    | <i>C. rubella</i>                     | - | - | - | - | - | - | - | - | - | - | G | P | L | N | L | G | W | D | R | W |   |
| XP_002876721.1     | <i>A. lyrata</i> subsp. <i>Lyrata</i> | - | - | - | - | - | - | - | - | - | - | G | P | F | N | L | G | W | D | R | W |   |
| NP_567147.1        | <i>A. thaliana</i> AGG1               | - | - | - | - | - | - | - | - | - | - | G | P | L | N | L | G | W | D | R | W |   |
| FF303368.1         | <i>V. unguiculata</i>                 | - | - | - | - | - | - | - | - | - | - | - | - | - | - | - | - | - | - | - | - |   |
| XP_002883385.1     | <i>A. lyrata</i> subsp. <i>Lyrata</i> | - | - | - | - | - | - | - | - | - | - | G | P | V | N | D | T | W | D | Q | W |   |
| ESXY5              | <i>L. japonicus</i>                   | - | - | - | - | - | - | - | - | - | - | G | P | V | S | P | S | W | D | K | W |   |
| Bra023782          | <i>B. rapa</i>                        | - | - | - | - | - | - | - | - | - | - | G | P | V | N | A | T | W | D | Q | W |   |
| ACX43275.1         | <i>B. napus</i>                       | - | - | - | - | - | - | - | - | - | - | G | P | V | N | A | T | W | D | Q | W |   |
| Thhalv10021823m    | <i>T. halophila</i>                   |   |   |   |   |   |   |   |   |   |   |   |   |   |   |   |   |   |   |   |   |   |

|                                                      |   |   |   |   |   |   |   |   |   |   |   |   |   |   |   |   |   |   |   |   |   |   |   |   |   |
|------------------------------------------------------|---|---|---|---|---|---|---|---|---|---|---|---|---|---|---|---|---|---|---|---|---|---|---|---|---|
| ABK264353.1 <i>P. sichensis</i>                      | F | K | E | R | S | - | I | N | S | N | - | - | - | - | - | - | - | - | C | S | C | C | C | S |   |
| PaGG3                                                | F | K | E | R | S | - | I | N | S | N | - | - | - | - | - | - | - | - | - | G | S | C | C | C | S |
| BT111616.1 <i>P. glauca</i>                          | F | K | E | R | S | - | I | N | S | N | - | - | - | - | - | - | - | - | - | G | S | C | C | C | S |
| DT638145.1 <i>P. taeda</i>                           | F | R | K | R | S | - | I | N | S | D | - | - | - | - | - | - | - | - | - | C | S | C | C | C | S |
| Pp1s22 182V6.1 <i>P. patens</i>                      | V | K | A | S | R | - | - | - | - | - | - | C | - | C | W | K | F | K | - | - | - | - | - | - | - |
| Pp1s39 119V6.2 <i>P. Patens</i>                      | S | K | - | S | R | R | - | H | W | W | - | - | - | - | - | K | F | - | - | - | - | - | - | - | - |
| Medtr8g021170.1 <i>M. truncatula</i>                 | - | - | - | - | - | - | - | - | - | - | - | - | - | - | - | - | - | - | - | C | C | S | Y | S | C |
| Phvul009G130200.1 <i>P. vulgaris</i>                 | - | - | - | - | - | - | - | - | - | - | - | - | - | C | F | N | L | S | W | I | C | C | C | C | C |
| Medtr4g125190.1 <i>M. truncatula</i>                 | - | - | - | - | - | - | - | - | - | - | - | - | - | C | F | N | L | S | W | I | C | C | C | C | C |
| Medtr2g042200.1 <i>M. truncatula</i>                 | - | - | - | - | - | - | - | - | - | - | - | - | I | L | Y | G | G | G | I | V | Q | Q | L | Y | - |
| Carubv10002620m <i>C. rubella</i>                    | - | - | - | - | - | - | - | - | - | - | - | - | - | C | L | S | L | V | S | F | C | C | C | C | Q |
| Thhalv10014548m <i>T. halophila</i>                  | - | - | - | - | - | - | - | - | - | - | - | - | - | C | L | S | L | A | S | F | C | C | C | C | Q |
| XP 002874008.1 <i>A. lyrata</i> subsp. <i>Lyrata</i> | - | - | - | - | - | - | - | - | - | - | - | - | - | C | L | S | L | V | S | F | C | C | C | C | Q |
| ATSG20635.1 <i>A. thaliana</i> AGG3                  | - | - | - | - | - | - | - | - | - | - | - | - | - | C | L | S | L | V | S | F | C | C | C | C | Q |
| ADE77369.1 <i>P. sichensis</i>                       | Q | I | - | - | - | L | D | V | R | - | - | - | - | C | P | S | T | S | S | S | G | C | C | C | M |
| PaGG4                                                | Q | I | - | - | - | L | D | V | R | - | - | - | - | C | P | S | T | S | S | P | C | C | C | C | M |
| Phvul007G175700.1 <i>P. vulgaris</i>                 | F | E | G | P | - | Q | D | P | Q | A | - | C | R | C | W | I | L | - | - | - | - | - | - | - | - |
| G71CP9 <i>M. truncatula</i>                          | F | E | G | P | - | Q | D | P | Q | A | - | C | R | C | W | I | L | - | - | - | - | - | - | - | - |
| Bras007741 <i>B. rapa</i>                            | F | E | G | P | - | D | G | G | D | G | - | C | R | C | F | I | L | - | - | - | - | - | - | - | - |
| EE532948.1 <i>R. napus</i>                           | F | Q | G | P | - | D | G | G | D | G | - | C | R | C | F | M | L | - | - | - | - | - | - | - | - |
| FD578839.1 <i>R. sativus</i>                         | F | E | G | P | - | N | G | G | E | G | - | C | R | C | Y | I | L | - | - | - | - | - | - | - | - |
| Thhalv10006334m <i>T. halophila</i>                  | F | E | G | P | - | N | G | G | E | G | - | C | R | C | F | I | L | - | - | - | - | - | - | - | - |
| Carubv10018305m <i>C. rubella</i>                    | F | E | G | P | - | N | G | G | E | G | - | C | R | C | L | I | L | - | - | - | - | - | - | - | - |
| XP 002876721.1 <i>A. lyrata</i> subsp. <i>Lyrata</i> | F | E | G | P | - | N | G | G | E | G | - | C | R | C | L | I | L | - | - | - | - | - | - | - | - |
| NP 567147.1 <i>A. thaliana</i> AGG1                  | F | E | G | P | - | N | G | G | E | G | - | C | R | C | L | I | L | - | - | - | - | - | - | - | - |
| FF3093368.1 <i>V. unguiculata</i>                    | - | - | - | - | - | - | - | - | - | - | - | - | - | - | - | - | - | - | - | - | - | - | - | - | - |
| XP 002883383.1 <i>A. lyrata</i> subsp. <i>Lyrata</i> | F | E | G | P |   |   |   |   |   |   |   |   |   |   |   |   |   |   |   |   |   |   |   |   |   |

1

|                                                         |   |   |   |   |   |   |   |   |   |   |   |   |   |   |   |   |   |   |   |   |   |   |   |   |   |   |
|---------------------------------------------------------|---|---|---|---|---|---|---|---|---|---|---|---|---|---|---|---|---|---|---|---|---|---|---|---|---|---|
| ABK26453.1 <i>P. sitchensis</i>                         | - | - | - | - | - | - | F | I | C | W | K | L | T | F | R | K | A | C | C | V | F | - | P | R | F | S |
| PaGG3                                                   | - | - | - | - | - | - | F | I | C | W | K | L | T | F | R | K | A | C | C | V | F | - | P | R | F | S |
| BT111616.1 <i>P. glauca</i>                             | - | - | - | - | - | - | F | I | C | W | K | L | T | F | R | K | A | C | C | V | F | - | P | R | F | S |
| DT638145.1 <i>P. taeda</i>                              | - | - | - | - | - | - | - | - | - | - | - | - | - | - | - | - | - | - | - | - | - | - | - | - | - |   |
| Pp1s22 182V6.1 <i>P. putens</i>                         | - | - | - | - | - | - | - | - | - | - | - | - | - | - | - | - | - | - | - | - | - | - | - | - | - |   |
| Pp1s39 119V6.2 <i>P. Patens</i>                         | - | - | - | - | - | - | - | - | - | - | - | - | - | - | - | - | - | - | - | - | - | - | - | - | - |   |
| Medtr8g021170.1 <i>M. truncatula</i>                    | C | - | - | - | - | - | F | G | N | N | C | - | - | - | - | - | - | - | - | - | - | - | - | - | - |   |
| Phvul.003G130200.1 <i>P. vulgaris</i>                   | S | C | S | C | - | - | L | P | S | I | K | C | C | S | L | P | K | W | S | C | C | G | S | C | P | K |
| Medtr4g125190.1 <i>M. truncatula</i>                    | S | C | S | N | C | F | P | S | F | T | C | - | S | L | P | K | W | N | C | C | C | C | - | - | I |   |
| Medtr2g042200.1 <i>M. truncatula</i>                    | C | C | N | C | K | Q | N | C | K | C | S | S | C | L | S | S | T | K | C | S | L | S | N | W | C |   |
| Carubv1000620m <i>C. rubella</i>                        | G | S | K | C | C | D | G | S | C | C | S | N | I | - | - | - | - | C | C | C | - | P | R | P | S |   |
| Thhalv10014548m <i>T. halophila</i>                     | G | S | K | C | C | D | G | S | C | C | S | D | I | - | - | - | - | C | C | C | - | P | R | P | S |   |
| XP_002874081.1 <i>A. lyrata</i> subsp. <i>Lyrata</i>    | G | S | K | C | C | D | G | S | C | C | S | N | I | - | - | - | - | C | C | C | - | P | R | P | S |   |
| AT5G20635.1 <i>A. thaliana</i> AGG3                     | G | S | K | C | C | D | G | S | C | C | S | N | I | - | - | - | - | C | C | C | - | P | R | L | S |   |
| ADE77369.1 <i>P. sitchensis</i>                         | - | - | - | - | - | - | - | - | - | - | - | - | - | F | L | K | K | W | R | C | S | C | W | K | M | S |
| PaGG4                                                   | - | - | - | - | - | - | - | - | - | - | - | - | - | F | L | K | K | W | R | C | S | C | W | K | M | S |
| Phvul.007G175700.1 <i>P. vulgaris</i>                   | - | - | - | - | - | - | - | - | - | - | - | - | - | - | - | - | - | - | - | - | - | - | - | - | - |   |
| G7ICP9 <i>M. truncatula</i>                             | - | - | - | - | - | - | - | - | - | - | - | - | - | - | - | - | - | - | - | - | - | - | - | - | - |   |
| Bra007741 <i>B. rapa</i>                                | - | - | - | - | - | - | - | - | - | - | - | - | - | - | - | - | - | - | - | - | - | - | - | - | - |   |
| EE552948.1 <i>B. napus</i>                              | - | - | - | - | - | - | - | - | - | - | - | - | - | - | - | - | - | - | - | - | - | - | - | - | - |   |
| FD578839.1 <i>R. sativus</i>                            | - | - | - | - | - | - | - | - | - | - | - | - | - | - | - | - | - | - | - | - | - | - | - | - | - |   |
| Thhalv10006334m <i>T. halophila</i>                     | - | - | - | - | - | - | - | - | - | - | - | - | - | - | - | - | - | - | - | - | - | - | - | - | - |   |
| Carubv10018305m <i>C. rubella</i>                       | - | - | - | - | - | - | - | - | - | - | - | - | - | - | - | - | - | - | - | - | - | - | - | - | - |   |
| XP_002876721.1 <i>A. lyrata</i> subsp. <i>Lyrata</i>    | - | - | - | - | - | - | - | - | - | - | - | - | - | - | - | - | - | - | - | - | - | - | - | - | - |   |
| NP_567147.1 <i>A. thaliana</i> AGG1                     | - | - | - | - | - | - | - | - | - | - | - | - | - | - | - | - | - | - | - | - | - | - | - | - | - |   |
| FF303368.1 <i>V. unguiculata</i>                        | - | - | - | - | - | - | - | - | - | - | - | - | - | - | - | - | - | - | - | - | - | - | - | - | - |   |
| XP_002883385.1 <i>A. lyrata</i> subsp. <i>Lyrata</i> </ |   |   |   |   |   |   |   |   |   |   |   |   |   |   |   |   |   |   |   |   |   |   |   |   |   |   |

m

|                                                      |   |   |   |   |   |   |   |   |   |   |   |   |   |   |   |   |   |   |   |   |   |   |   |   |   |
|------------------------------------------------------|---|---|---|---|---|---|---|---|---|---|---|---|---|---|---|---|---|---|---|---|---|---|---|---|---|
| ABK26455.1 <i>P. stichensis</i>                      | C | H | K | - | - | C | C | C | F | Q | C | S | C | A | G | C | I | K | - | - | C | C | P | L | C |
| PaGG3                                                | C | Y | K | - | - | C | C | C | F | Q | C | S | C | A | G | C | I | K | - | - | C | C | P | L | C |
| BT111616.1 <i>P. glauca</i>                          | C | Y | K | - | - | C | C | C | F | Q | C | S | W | A | G | C | I | K | - | - | C | C | P | L | C |
| DT638145.1 <i>P. taeda</i>                           | - | - | - | - | - | - | - | - | - | - | S | S | A | G | S | - | - | - | - | - | - | - | - | - | - |
| Pp1s22 182V6.1 <i>P. patens</i>                      | - | - | - | - | - | - | - | - | - | - | - | - | - | - | - | - | - | - | - | - | - | - | - | - | - |
| Pp1s39 119V6.2 <i>P. Patens</i>                      | - | - | - | - | - | - | - | - | - | - | - | - | - | - | - | - | - | - | - | - | - | - | - | - | - |
| Medtr8g021170.1 <i>M. truncatula</i>                 | - | - | - | - | - | - | - | - | - | - | - | - | - | - | - | - | - | - | - | - | - | - | - | - | - |
| Phvul.003G130200.1 <i>P. vulgaris</i>                | S | Y | - | - | - | - | - | F | C | K | E | S | C | G | F | G | N | - | - | - | - | C | C | T | L |
| Medtr4g125190.1 <i>M. truncatula</i>                 | S | C | P | K | S | N | C | C | K | - | Q | S | L | G | S | G | N | - | - | - | - | C | C | T | F |
| Medtr2g042200.1 <i>M. truncatula</i>                 | C | C | F | D | K | K | S | H | C | C | K | E | F | C | G | C | N | N | C | C | C | I | L | S | G |
| Carubv10002620m <i>C. rubella</i>                    | C | P | S | C | P | S | C | P | S | C | S | C | F | R | - | - | - | - | - | - | - | D | C | C | S |
| Thhalv10014548m <i>T. halophila</i>                  | C | P | S | C | P | S | C | S | S | C | S | C | F | R | G | C | C | C | S | C | P | D | L | S | C |
| XP 002874008.1 <i>A. lyrata</i> subsp. <i>Lyrata</i> | C | P | S | C | S | C | - | - | - | - | - | F | R | G | C | C | C | S | C | P | D | M | S | C |   |
| AT5G20635.1 <i>A. thaliana</i> AGG3                  | C | P | S | C | S | C | - | - | - | - | - | F | R | G | C | W | C | S | C | P | D | M | S | C |   |
| ADE77369.1 <i>P. stichensis</i>                      | C | N | S | C | - | C | K | I | P | S | I | S | C | - | G | K | C | S | - | F | L | E | C | S | C |
| PaGG4                                                | C | N | S | C | - | C | K | I | P | S | I | S | C | - | G | K | C | S | - | F | L | E | C | S | C |
| Phvul.007G175700.1 <i>P. vulgaris</i>                | - | - | - | - | - | - | - | - | - | - | - | - | - | - | - | - | - | - | - | - | - | - | - | - | - |
| G71CP9 <i>M. truncatula</i>                          | - | - | - | - | - | - | - | - | - | - | - | - | - | - | - | - | - | - | - | - | - | - | - | - | - |
| Bra007741 <i>B. rapa</i>                             | - | - | - | - | - | - | - | - | - | - | - | - | - | - | - | - | - | - | - | - | - | - | - | - | - |
| EE552948.1 <i>B. napus</i>                           | - | - | - | - | - | - | - | - | - | - | - | - | - | - | - | - | - | - | - | - | - | - | - | - | - |
| FD578839.1 <i>R. sativus</i>                         | - | - | - | - | - | - | - | - | - | - | - | - | - | - | - | - | - | - | - | - | - | - | - | - | - |
| Thhalv10006334m <i>T. halophila</i>                  | - | - | - | - | - | - | - | - | - | - | - | - | - | - | - | - | - | - | - | - | - | - | - | - | - |
| Carubv10018305m <i>C. rubella</i>                    | - | - | - | - | - | - | - | - | - | - | - | - | - | - | - | - | - | - | - | - | - | - | - | - | - |
| XP 002876721.1 <i>A. lyrata</i> subsp. <i>Lyrata</i> | - | - | - | - | - | - | - | - | - | - | - | - | - | - | - | - | - | - | - | - | - | - | - | - | - |
| NP 567147.1 <i>A. thaliana</i> AGG1                  | - | - | - | - | - | - | - | - | - | - | - | - | - | - | - | - | - | - | - | - | - | - | - | - | - |
| FF393368.1 <i>V. unguiculata</i>                     | - | - | - | - | - | - | - | - | - | - | - | - | - | - | - | - | - | - | - | - | - | - | - | - | - |
| XP 002883385.1 <i>A. lyrata</i> subsp. <i>Lyrata</i> | - | - | - | - | - | - | - | - | - | - | - | - | - | - | - | - | - | - | - | - | - | - | - | - | - |
| I3SXY3 <i>L. japonicus</i>                           | - | - | - | - | - | - | - | - | - | - | - | - | - | - | - | - | - | - | - | - | - | - | - | - | - |
| Bra023782 <i>B. rapa</i>                             | - | - | - | - | - | - | - | - | - | - | - | - | - | - | - | - | - | - | - | - | - | - | - | - | - |
| ACX43275.1 <i>B. napus</i>                           | - | - | - | - | - | - | - | - | - | - | - | - | - | - | - | - | - | - | - | - | - | - | - | - | - |
| Thhalv10021823m <i>T. halophila</i>                  | - | - | - | - | - | - | - | - | - | - | - | - | - | - | - | - | - | - | - | - | - | - | - | - | - |
| Phvul.007G111000.1 <i>P. vulgaris</i>                | - | - | - | - | - | - | - | - | - | - | - | - | - | - | - | - | - | - | - | - | - | - | - | - | - |
| FF545146.1 <i>V. unguiculata</i>                     | - | - | - | - | - | - | - | - | - | - | - | - | - | - | - | - | - | - | - | - | - | - | - | - | - |
| I3T376 <i>L. japonicus</i>                           | - | - | - | - | - | - | - | - | - | - | - | - | - | - | - | - | - | - | - | - | - | - | - | - | - |
| Carubv10014985m <i>C. rubella</i>                    | - | - | - | - | - | - | - | - | - | - | - | - | - | - | - | - | - | - | - | - | - | - | - | - | - |
| NP 850746.1 <i>A. thaliana</i> AGG2                  | - | - | - | - | - | - | - | - | - | - | - | - | - | - | - | - | - | - | - | - | - | - | - | - | - |
| PaGG1                                                | - | - | - | - | - | - | - | - | - | - | - | - | - | - | - | - | - | - | - | - | - | - | - | - | - |
| ADE76615.1 <i>P. stichensis</i>                      | - | - | - | - | - | - | - | - | - | - | - | - | - | - | - | - | - | - | - | - | - | - | - | - | - |
| EX389861.1 <i>P. glauca</i>                          | - | - | - | - | - | - | - | - | - | - | - | - | - | - | - | - | - | - | - | - | - | - | - | - | - |
| CO158867.1 <i>P. taeda</i>                           | - | - | - | - | - | - | - | - | - | - | - | - | - | - | - | - | - | - | - | - | - | - | - | - | - |
| BX254993.1/BX680269.1 <i>P. pinaster</i>             | - | - | - | - | - | - | - | - | - | - | - | - | - | - | - | - | - | - | - | - | - | - | - | - | - |
| GT252854.1 <i>P. contorta</i>                        | - | - | - | - | - | - | - | - | - | - | - | - | - | - | - | - | - | - | - | - | - | - | - | - | - |
| Phvul.001G057600.1 <i>P. vulgaris</i>                | - | - | - | - | - | - | - | - | - | - | - | - | - | - | - | - | - | - | - | - | - | - | - | - | - |
| I3SQN8 <i>L. japonicus</i>                           | - | - | - | - | - | - | - | - | - | - | - | - | - | - | - | - | - | - | - | - | - | - | - | - | - |
| PaGG2                                                | - | - | - | - | - | - | - | - | - | - | - | - | - | - | - | - | - | - | - | - | - | - | - | - | - |
| DR093846 <i>P. taeda</i>                             | - | - | - | - | - | - | - | - | - | - | - | - | - | - | - | - | - | - | - | - | - | - | - | - | - |
| GT123649.1 <i>P. stichensis</i>                      | - | - | - | - | - | - | - | - | - | - | - | - | - | - | - | - | - | - | - | - | - | - | - | - | - |
| BT117176.1 <i>P. glauca</i>                          | - | - | - | - | - | - | - | - | - | - | - | - | - | - | - | - | - | - | - | - | - | - | - | - | - |

n

|                                                      |   |   |   |   |   |   |   |   |   |   |   |   |   |   |   |   |   |   |   |   |   |   |   |   |   |
|------------------------------------------------------|---|---|---|---|---|---|---|---|---|---|---|---|---|---|---|---|---|---|---|---|---|---|---|---|---|
| ABK26455.1 <i>P. stichensis</i>                      | K | N | K | - | - | - | - | - | - | - | - | - | - | - | - | - | - | - | - | - | - | - | - | - | - |
| PaGG3                                                | K | N | K | - | - | - | - | - | - | - | - | - | - | - | - | - | - | - | - | - | - | - | - | - | - |
| BT111616.1 <i>P. glauca</i>                          | K | N | K | - | - | - | - | - | - | - | - | - | - | - | - | - | - | - | - | - | - | - | - | - | - |
| DT638145.1 <i>P. taeda</i>                           | - | - | - | - | - | - | - | - | - | - | - | - | - | - | - | - | - | - | - | - | - | - | - | - | - |
| Pp1s22 182V6.1 <i>P. patens</i>                      | - | - | - | - | - | - | - | - | - | - | - | - | - | - | - | - | - | - | - | - | - | - | - | - | - |
| Pp1s39 119V6.2 <i>P. Patens</i>                      | - | - | - | - | - | - | - | - | - | - | - | - | - | - | - | - | - | - | - | - | - | - | - | - | - |
| Medtr8g021170.1 <i>M. truncatula</i>                 | - | - | - | - | - | - | - | - | - | - | - | - | - | - | - | - | - | - | - | - | - | - | - | - | - |
| Phvul.003G130200.1 <i>P. vulgaris</i>                | P | R | S | C | N | - | - | F | G | Y | P | T | C | P | S | C | P | S | C | C | - | - | - | - | - |
| Medtr4g125190.1 <i>M. truncatula</i>                 | P | T | S | C | N | - | - | F | G | C | P | S | - | - | - | - | - | - | - | - | - | - | - | - | - |
| Medtr2g042200.1 <i>M. truncatula</i>                 | C | N | F | R | W | P | F | - | P | S | C | G | C | - | - | - | - | - | - | - | - | - | - | - | - |
| Carubv10002620m <i>C. rubella</i>                    | C | P | D | L | S | C | C | I | P | T | C | F | R | S | C | S | C | A | R | P | S | C | V | S | K |
| Thhalv10014548m <i>T. halophila</i>                  | C | I | P | T | C | F | R | G | C | T | - | - | - | - | - | - | - | R | P | S | C | L | S | K |   |
| XP 002874008.1 <i>A. lyrata</i> subsp. <i>Lyrata</i> | C | I | P | S | C | F | R | N | C | S | C | T | - | - | - | - | - | R | P | S | C | L | N | K |   |
| AT5G20635.1 <i>A. thaliana</i> AGG3                  | C | I | P | S | C | F | R | S | C | S | C | T | - | - | - | - | - | R | P | S | C | L | N | K |   |
| ADE77369.1 <i>P. stichensis</i>                      | - | F | K | C | V | K | C | C | C | P | C | R | R | K | - | - | - | - | - | - | - | - | - | - | - |
| PaGG4                                                | - | F | K | C | V | K | C | C | C | P | C | R | R | K | - | - | - | - | - | - | - | - | - | - | - |
| Phvul.007G175700.1 <i>P. vulgaris</i>                | - | - | - | - | - | - | - | - | - | - | - | - | - | - | - | - | - | - | - | - | - | - | - | - | - |
| G71CP9 <i>M. truncatula</i>                          | - | - | - | - | - | - | - | - | - | - | - | - | - | - | - | - | - | - | - | - | - | - | - | - | - |
| Bra007741 <i>B. rapa</i>                             | - | - | - | - | - | - | - | - | - | - | - | - | - | - | - | - | - | - | - | - | - | - | - | - | - |
| EE552948.1 <i>B. napus</i>                           | - | - | - | - | - | - | - | - | - | - | - | - | - | - | - | - | - | - | - | - | - | - | - | - | - |
| FD578839.1 <i>R. sativus</i>                         | - | - | - | - | - | - | - | - | - | - | - | - | - | - | - | - | - | - | - | - | - | - | - | - | - |
| Thhalv10006334m <i>T. halophila</i>                  | - | - | - | - | - | - | - | - | - | - | - | - | - | - | - | - | - | - | - | - | - | - | - | - | - |
| Carubv10018305m <i>C. rubella</i>                    | - | - | - | - | - | - | - | - | - | - | - | - | - | - | - | - | - | - | - | - | - | - | - | - | - |
| XP 002876721.1 <i>A. lyrata</i> subsp. <i>Lyrata</i> | - | - | - | - | - | - | - | - | - | - | - | - | - | - | - | - | - | - | - | - | - | - | - | - | - |
| NP 567147.1 <i>A. thaliana</i> AGG1                  | - | - | - | - | - | - | - | - | - | - | - | - | - | - | - | - | - | - | - | - | - | - | - | - | - |
| FF393368.1 <i>V. unguiculata</i>                     | - | - | - | - | - | - | - | - | - | - | - | - | - | - | - | - | - | - | - | - | - | - | - | - | - |
| XP 002883385.1 <i>A. lyrata</i> subsp. <i>Lyrata</i> | - | - | - | - | - | - | - | - | - | - | - | - | - | - | - | - | - | - | - | - | - | - | - | - | - |
| I3SXY5 <i>L. japonicus</i>                           | - | - | - | - | - | - | - | - | - | - | - | - | - | - | - | - | - | - | - | - | - | - | - | - | - |
| Bra023782 <i>B. rapa</i>                             | - | - | - | - | - | - | - | - | - | - | - | - | - | - | - | - | - | - | - | - | - | - | - | - | - |
| ACX43275.1 <i>B. napus</i>                           | - | - | - | - | - | - | - | - | - | - | - | - | - | - | - | - | - | - | - | - | - | - | - | - | - |
| Thhalv10021823m <i>T. halophila</i>                  | - | - | - | - | - | - | - | - | - | - | - | - | - | - | - | - | - | - | - | - | - | - | - | - | - |
| Phvul.007G111000.1 <i>P. vulgaris</i>                | - | - | - | - | - | - | - | - | - | - | - | - | - | - | - | - | - | - | - | - | - | - | - | - | - |
| FF545146.1 <i>V. unguiculata</i>                     | - | - | - | - | - | - | - | - | - | - | - | - | - | - | - | - | - | - | - | - | - | - | - | - | - |
| EST376 <i>L. japonicus</i>                           | - | - | - | - | - | - | - | - | - | - | - | - | - | - | - | - | - | - | - | - | - | - | - | - | - |
| Carubv10014985m <i>C. rubella</i>                    | - | - | - | - | - | - | - | - | - | - | - | - | - | - | - | - | - | - | - | - | - | - | - | - | - |
| NP 850746.1 <i>A. thalina</i> AGG2                   | - | - | - | - | - | - | - | - | - | - | - | - | - | - | - | - | - | - | - | - | - | - | - | - | - |
| PaGG1                                                | - | - | - | - | - | - | - | - | - | - | - | - | - | - | - | - | - | - | - | - | - | - | - | - | - |
| ADE76615.1 <i>P. stichensis</i>                      | - | - | - | - | - | - | - | - | - | - | - | - | - | - | - | - | - | - | - | - | - | - | - | - | - |
| EX380861.1 <i>P. glauca</i>                          | - | - | - | - | - | - | - | - | - | - | - | - | - | - | - | - | - | - | - | - | - | - | - | - | - |
| CO158867.1 <i>P. taeda</i>                           | - | - | - | - | - | - | - | - | - | - | - | - | - | - | - | - | - | - | - | - | - | - | - | - | - |
| BX254993.1/BX680269.1 <i>P. pinaster</i>             | - | - | - | - | - | - | - | - | - | - | - | - | - | - | - | - | - | - | - | - | - | - | - | - | - |
| GT252854.1 <i>P. contorta</i>                        | - | - | - | - | - | - | - | - | - | - | - | - | - | - | - | - | - | - | - | - | - | - | - | - | - |
| Phvul.001G057600.1 <i>P. vulgaris</i>                | - | - | - | - | - | - | - | - | - | - | - | - | - | - | - | - | - | - | - | - | - | - | - | - | - |
| ESQN8 <i>L. japonicus</i>                            | - | - | - | - | - | - | - | - | - | - | - | - | - | - | - | - | - | - | - | - | - | - | - | - | - |
| PaGG2                                                | - | - | - | - | - | - | - | - | - | - | - | - | - | - | - | - | - | - | - | - | - | - | - | - | - |
| DR093846 <i>P. taeda</i>                             | - | - | - | - | - | - | - | - | - | - | - | - | - | - | - | - | - | - | - | - | - | - | - | - | - |
| GT123649.1 <i>P. stichensis</i>                      | - | - | - | - | - | - | - | - | - | - | - | - | - | - | - | - | - | - | - | - | - | - | - | - | - |
| BT117176.1 <i>P. glauca</i>                          | - | - | - | - | - | - | - | - | - | - | - | - | - | - | - | - | - | - | - | - | - | - | - | - | - |
